# Supplementary material for: Effect of Supplementation of Flour with Fruit Fiber on the Volatile Compound Profile in Bread
Source: MDPI journal article supplement (doi:10.3390/s21082812), 2021-04-16
Supplement: s1 [file s1]

# Effect of Supplementation of Flour with Fruit Fiber on the Volatile Compound Profile in Bread

Robert Rusinek <sup>1,\*</sup>, Marzena Gawrysiak-Witulska <sup>2</sup>, Aleksander Siger <sup>3</sup>, Anna Oniszczyk <sup>4</sup>, Aneta A. Ptaszyńska <sup>5</sup>, Jarosław Knaga <sup>6</sup>, Urszula Malaga-Toboła <sup>6</sup> and Marek Gancarz <sup>1,6</sup>

<sup>1</sup> Institute of Agrophysics, Polish Academy of Sciences, Doświadczalna 4, 20-290 Lublin, Poland; m.gancarz@ipan.lublin.pl

<sup>2</sup> Institute of Food Technology of Plant Origin, Faculty of Food Science and Nutrition, Poznań University of Life Science, Wojska Polskiego 28, 60-637 Poznań, Poland; wima@up.poznan.pl

<sup>3</sup> Department of Food Biochemistry and Analysis, Faculty of Food Science and Nutrition, Poznań University of Life Sciences, Wojska Polskiego 31, 60-634 Poznań, Poland; aleksander.siger@up.poznan.pl

<sup>4</sup> Department of Inorganic Chemistry, Medical University of Lublin, Chodźki 4a, 20-093 Lublin, Poland; anoniszczyk@o2.pl

<sup>5</sup> Department of Immunobiology, Institute of Biological Sciences, Faculty of Biology and Biotechnology, Maria Curie-Skłodowska University, Akademicka 19, 20-033 Lublin, Poland; aneta.ptaszynska@poczta.umcs.lublin.pl

<sup>6</sup> Faculty of Production and Power Engineering, University of Agriculture in Kraków, Balicka 116B, 30-149 Kraków, Poland; jaroslaw.knaga@ur.krakow.pl (J.K.); umalagatobola@gmail.com (U.M.-T.)

\* Correspondence: r.rusinek@ipan.lublin.pl; Tel.: +48-81-744-50-61; Fax: +48-81-744-50-67

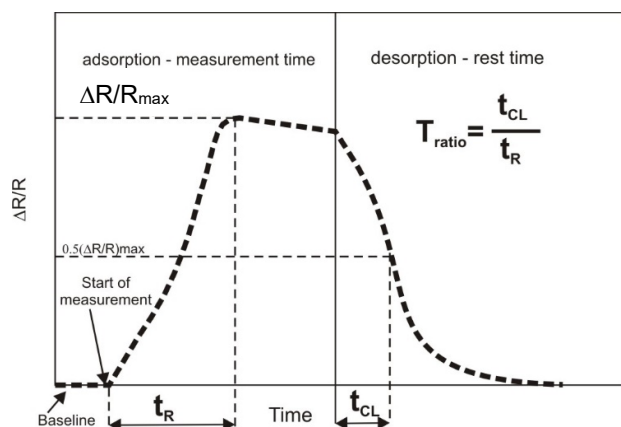

**Figure S1.** Scheme of a typical sensorgram for MOS sensors with ratio of reaction times of  $t_R$  and  $t_{CL}$ , marked on the graph.
